# Supplementary material for: Mouse APOBEC1 cytidine deaminase can induce somatic mutations in chromosomal DNA
Source: PubMed Central journal article supplement (PMC6854741; doi:10.1186/s12864-019-6216-x), 2019-11-14
Supplement: 12864_2019_6216_MOESM1_ESM.pdf [file 12864_2019_6216_MOESM1_ESM.pdf]

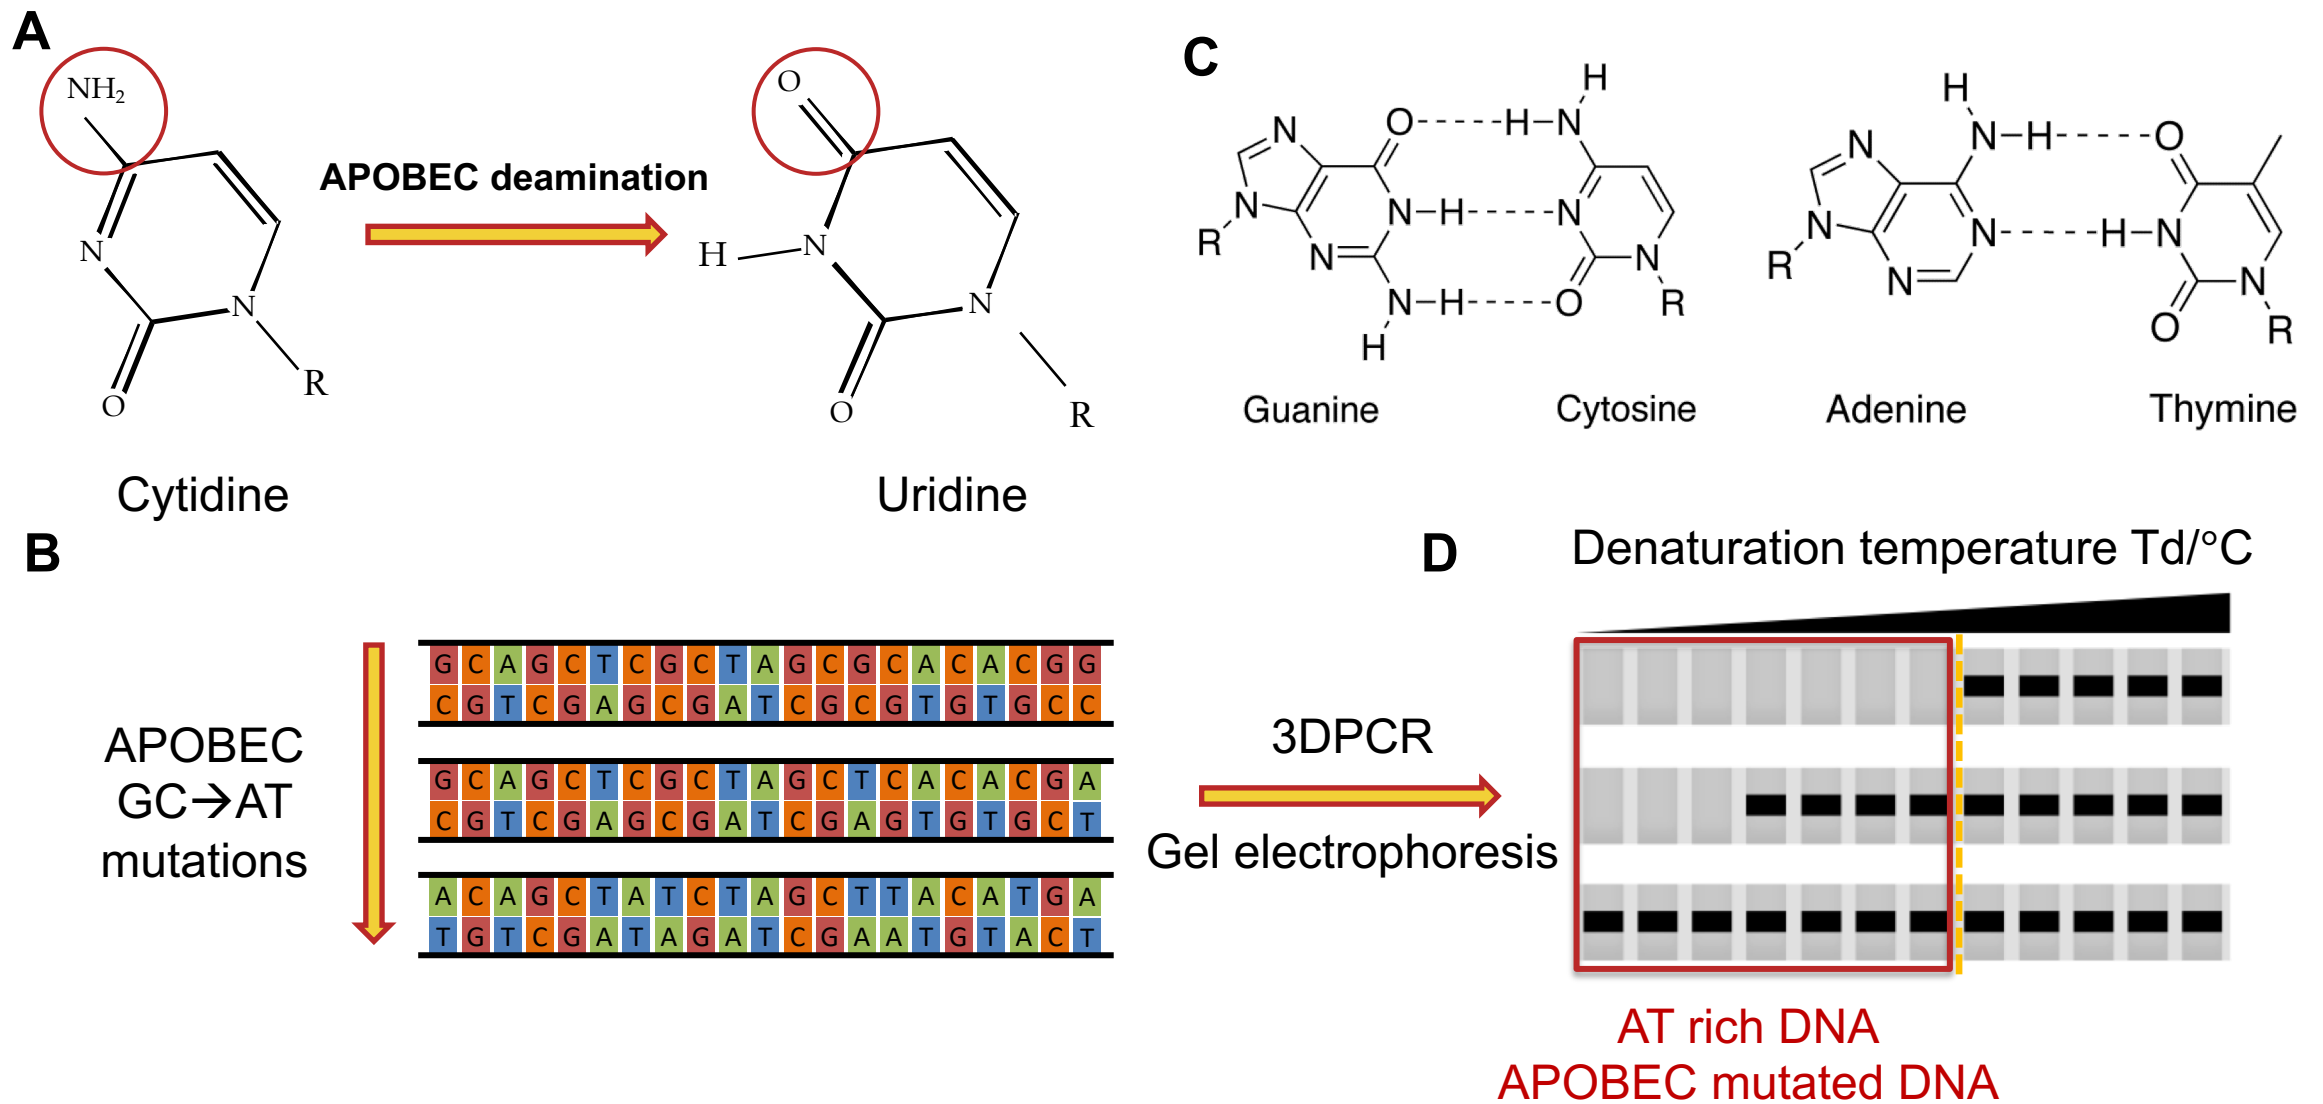

**Supplementary Figure 1 : Differential DNA denaturation 3DPCR.**

**A)** APOBEC cytidine deaminases deaminate cytidine into uridine in single stranded DNA. **B)** APOBEC activity leads to the accumulation of GC  $\rightarrow$  AT mutations. **C)** As GC basepairs with 3 hydrogen bonds and AT with 2 hydrogen bonds, AT rich DNA requires less energy for denaturation allowing PCR amplification at lower denaturation  $T_d/^\circ\text{C}$ . **D)** PCR amplification with a gradient of denaturation temperatures allows to pick up AT rich APOBEC mutated DNA below the restrictive temperature of non mutated DNA, represented by the yellow dotted line.

**A**

Kanamycin 3D-PCR at 84.6°C

| Mouse     |    |   |   |    | Rabbit    |    |   |   |    | Pig       |    |   |   |    | Cow       |    |   |   |    | Dog       |    |   |   |    |
|-----------|----|---|---|----|-----------|----|---|---|----|-----------|----|---|---|----|-----------|----|---|---|----|-----------|----|---|---|----|
| ↶         | T  | C | G | A  | ↶         | T  | C | G | A  | ↶         | T  | C | G | A  | ↶         | T  | C | G | A  | ↶         | T  | C | G | A  |
| T         |    | 1 | 0 | 0  | T         |    | 0 | 0 | 0  | T         |    | 0 | 0 | 0  | T         |    | 0 | 0 | 0  | T         |    | 0 | 0 | 0  |
| C         | 59 |   | 0 | 1  | C         | 53 |   | 1 | 0  | C         | 42 |   | 0 | 0  | C         | 93 |   | 0 | 0  | C         | 63 |   | 0 | 0  |
| G         | 0  | 0 |   | 87 | G         | 0  | 0 |   | 43 | G         | 0  | 0 |   | 35 | G         | 0  | 0 |   | 39 | G         | 0  | 0 |   | 58 |
| A         | 0  | 0 | 0 |    | A         | 0  | 0 | 1 |    | A         | 1  | 0 | 0 |    | A         | 0  | 0 | 0 |    | A         | 0  | 0 | 1 |    |
| n=2430 bp |    |   |   |    | n=2565 bp |    |   |   |    | n=2430 bp |    |   |   |    | n=2565 bp |    |   |   |    | n=2160 bp |    |   |   |    |

**B**

Cytochrome C 3D-PCR at 82.3°C

| Mouse     |   |   |   |     | Rabbit    |   |   |   |     | Pig      |    |   |   |    | Cow        |   |   |   |    | Dog       |   |   |   |     |
|-----------|---|---|---|-----|-----------|---|---|---|-----|----------|----|---|---|----|------------|---|---|---|----|-----------|---|---|---|-----|
| ↶         | T | C | G | A   | ↶         | T | C | G | A   | ↶        | T  | C | G | A  | ↶          | T | C | G | A  | ↶         | T | C | G | A   |
| T         |   | 0 | 1 | 0   | T         |   | 0 | 0 | 0   | T        |    | 0 | 1 | 0  | T          |   | 0 | 0 | 0  | T         |   | 1 | 0 | 0   |
| C         | 0 |   | 0 | 0   | C         | 0 |   | 0 | 0   | C        | 33 |   | 0 | 0  | C          | 0 |   | 0 | 0  | C         | 0 |   | 0 | 1   |
| G         | 0 | 0 |   | 133 | G         | 0 | 0 |   | 107 | G        | 0  | 0 |   | 16 | G          | 0 | 0 |   | 71 | G         | 0 | 0 |   | 117 |
| A         | 0 | 0 | 1 |     | A         | 0 | 0 | 0 |     | A        | 1  | 0 | 0 |    | A          | 0 | 0 | 0 |    | A         | 0 | 0 | 1 |     |
| n=1288 bp |   |   |   |     | n=1656 bp |   |   |   |     | n=920 bp |    |   |   |    | n= 1472 bp |   |   |   |    | n=1288 bp |   |   |   |     |

**C**

CMYC 3D-PCR at 89.4°C

Mouse

| ↶ | T  | C | G | A |
|---|----|---|---|---|
| T |    | 0 | 0 | 0 |
| C | 82 |   | 0 | 0 |
| G | 0  | 0 |   | 0 |
| A | 0  | 0 | 0 |   |

n=1616 bp

**D**

HIV-1 V1V2 3D-PCR at 81.2°C

Mouse dC

Mouse 5MedC

| Mouse dC |   |   |   |     | Mouse 5MedC |    |   |   |     |
|----------|---|---|---|-----|-------------|----|---|---|-----|
| ↶        | T | C | G | A   | ↶           | T  | C | G | A   |
| T        |   | 1 | 0 | 1   | T           |    | 1 | 0 | 2   |
| C        | 5 |   | 0 | 0   | C           | 24 |   | 0 | 1   |
| G        | 0 | 0 |   | 283 | G           | 0  | 0 |   | 110 |
| A        | 1 | 0 | 1 |     | A           | 0  | 0 | 1 |     |

n=3948 bp

n=2820 bp

**Supplementary Figure 2** : Mutation matrices of APOBEC1 mutated sequences.

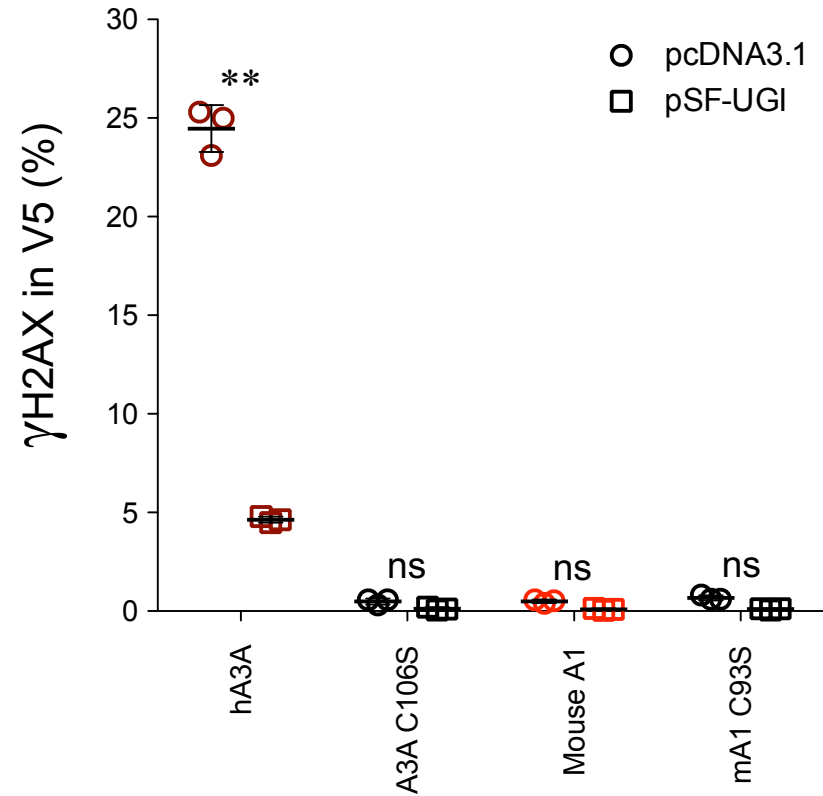

**Supplementary Figure 3 :** Double strand breaks formation upon APOBEC transfection requires UNG.

Double strand breaks formation upon A1 transfection in QT6 cells by flow cytometry analysis of  $\gamma$ H2AX staining in V5 transfected cells 48 hours post-transfection. Human APOBEC3A (hA3A) was used as positive control. Circles represent data from  $\gamma$ H2AX staining upon transfection with pcDNA3.1 APOBEC plasmids while squares represent  $\gamma$ H2AX staining upon transfection with a dual promoter vector co-expressing APOBEC sequences along with the UGI UNG inhibitor. Error bars represent the standard deviations from three independent transfections. Differences between pcDNA3.1 and pSF-UGI transfections were calculated using student t test (\*\* p<0.01).

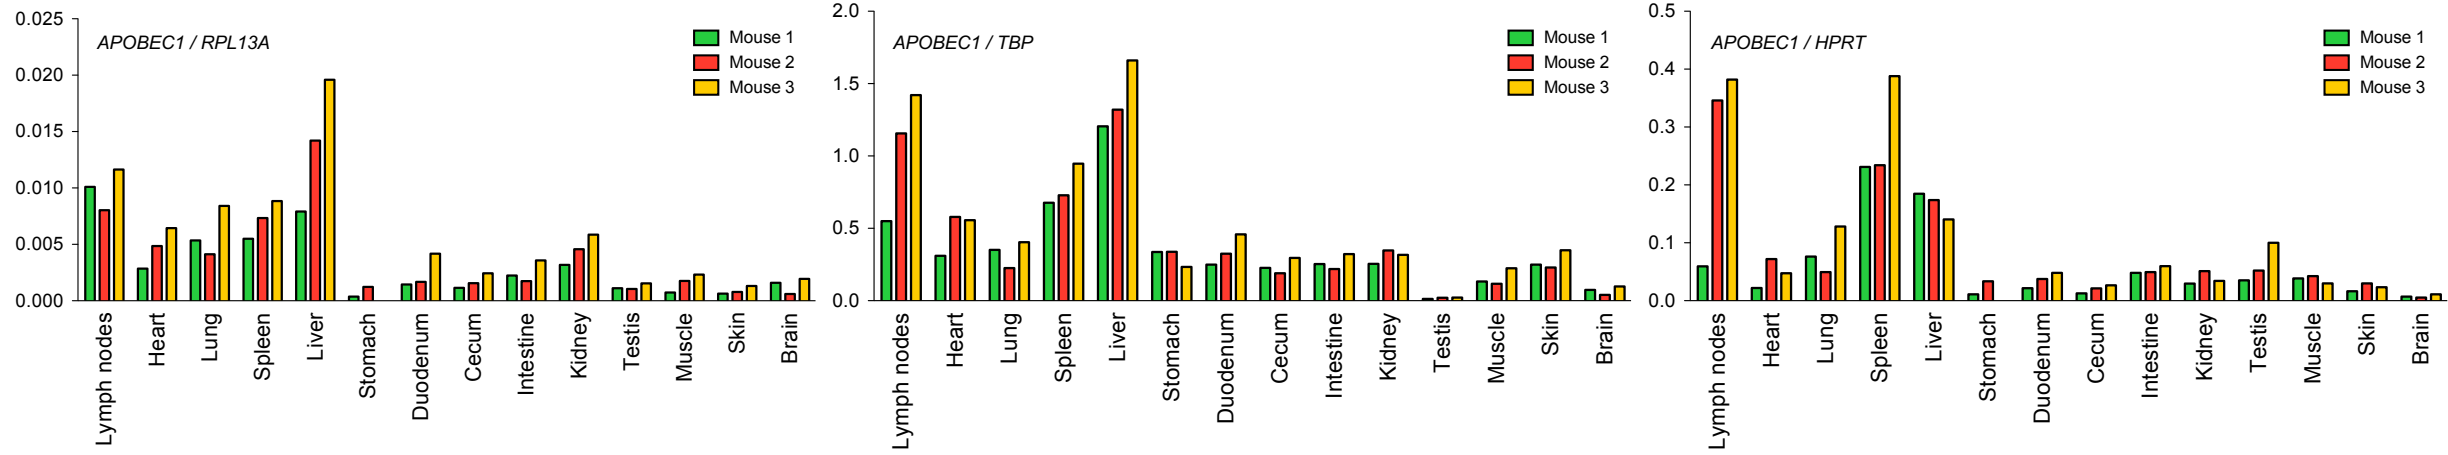

**Supplementary Figure 4 : Expression profile of APOBEC1.**

APOBEC1 expression in 3 C57/BL6 mice tissues normalized on RPL13A, TBP, and HPRT reference genes.

| Plasmid      | Matrix       | Primers                                                                                |
|--------------|--------------|----------------------------------------------------------------------------------------|
| Human A1     | NM_001644    | For : 5'- CACC <b>ATG</b> ACTTCTGAGAAAGGTCC<br>Rev : 5'- TCTCCAAGCCACAGAAGGATGTATC     |
| Rabbit A1    | NM_001082341 | For : 5'- CACC <b>ATG</b> GCTTCGAGAAAGGTC<br>Rev : 5'- TCTCCAAGGCACAGAAGGTTG           |
| Mouse A1     | NM_031159    | For : 5'- CACC <b>ATG</b> AGTTCCGAGACAGGCC<br>Rev : 5'- TTCAACCCCTGTAGCCCAAAGG         |
| Opossum A1   | NM_001032982 | For : 5'- CACC <b>ATG</b> AATTCTAAGACAGGTCCA<br>Rev : 5'- TCTCCAGGTCACAAATGGCTGG       |
| Armadillo A1 | XM_004455274 | For : 5'- CACC <b>ATG</b> ACTTCTGAGACAGGTCCTTC<br>Rev : 5'- TCTCCAAGTCATGGAAGGTTGTATT  |
| Cow A1       | XM_002687817 | For : 5'- CACC <b>ATG</b> GCTTCTGACAGAGGTCCTCCA<br>Rev : 5'- TCTCCAAGTCATAGGAAGTTGTACC |
| Pig A1       | XM_003126519 | For : 5'- CACC <b>ATG</b> GCTTCTGACAGAGGTCCTTC<br>Rev : 5'- TCTGTAAATCACAGGTAGTTGTATC  |
| Macaque A1   | XM_005570020 | For : 5'- CACC <b>ATG</b> ACTTCTGAGAAAGGTCCTTC<br>Rev : 5'- TCTCCAAGTCACGGAAGGCTGTATC  |
| Marmoset A1  | XM_009003530 | For : 5'- ATGACTTCTGAGAGAGGTCCTTC<br>Rev : 5'- TCTCCAAGTCACAGAAGGCTGGATC               |
| Hedgehog A1  | XM_004717433 | For : 5'- CACC <b>ATG</b> ACTGCTGAGAAAGGTCCTTC<br>Rev : 5'- CTGAGTCACAGAAGGTGGTATCAAC  |
| Dog A1       | XM_543826    | For : 5'- CACC <b>ATG</b> GCTTCTGACAAAGGTCCTTC<br>Rev : 5'- TCTCCAAGTCACAAGAGGTTGTATC  |
| Cat A1       | XM_543826    | For : 5'- CACC <b>ATG</b> GCTTCTGACAAAGGTCCTTC<br>Rev : 5'- TCTCCAAGTCACAAGAGGTTGTATC  |

**Supplementary table 1 : Compendium of primers used for APOBEC1 amplification and cloning**

| Plasmid       | Matrix               | Primers                                                                                    |
|---------------|----------------------|--------------------------------------------------------------------------------------------|
| Mouse A1 C93S | pcDNA3.1<br>Mouse A1 | For : 5'- CTGTCCTGGAGTCCCAGCGGGGAGTGCTCCAGG<br>Rev : 5'- CCTGGAGCACTCCCCGCTGGGACTCCAGGACAG |

**Supplementary table 2 : Primers used for mutagenesis**

| Primer            | Application        | Sequence                           | Cycling conditions                                                         |
|-------------------|--------------------|------------------------------------|----------------------------------------------------------------------------|
| Kanamycin out fwd | kanamycin PCR      | 5'- CGACCTGTCCGGTGCCCTGAATGAA      | 95°C 5 min<br>37x (95°C 30 sec, 60°C 30 sec, 72°C 1 min), 72°C 10 min      |
| Kanamycin out rev | kanamycin PCR      | 5'- GACGGCCACAGTCGATGAATCCAGAA     |                                                                            |
| Kanamycin in fwd  | kanamycin 3DPCR    | 5'- TCATCTCACCTTGCTCCTGCCGAGAA     | 81-89°C 5 min<br>42x (81-89°C 1 min, 60°C 45 sec, 72°C 2 min), 72°C 10 min |
| Kanamycin in rev  | kanamycin 3DPCR    | 5'- CTTGTCAGATCATCCTGATCGACAA      |                                                                            |
| CytC out fwd      | Cytochrome C PCR   | 5'- CATCCAAAGCAGGTCAACCTATGACAA    | 95°C 5 min<br>35x (95°C 30 sec, 60°C 30 sec, 72°C 1 min), 72°C 10 min      |
| CytC out rev      | Cytochrome C PCR   | 5'- TCTTGGTTAAGAGGTGTGGTCTGTAA     |                                                                            |
| CytC in fwd       | Cytochrome C 3DPCR | 5'- CCTCTACACAGCGTAGACTTACATCAA    | 80-86°C 5 min<br>35x (80-86°C 1 min, 60°C 30 sec, 72°C 2 min, 72°C 10 min) |
| CytC in rev       | Cytochrome C 3DPCR | 5'- AAGACCTCGTTTAGCCATTCATACAA     |                                                                            |
| QT6 cMyc out fwd  | cMyc PCR           | 5'- GATGCCGCTCAGCGCCAGCCTCCCCAGCAA | 95°C 5 min<br>40x (95°C 1 min, 58°C 45 sec, 72°C 2 min), 72°C 10 min       |
| QT6 cMyc out rev  | cMyc PCR           | 5'- GCAGTCTGGATGATGATGGATTTGACGAA  |                                                                            |
| QT6 cMyc in fwd   | cMyc 3DPCR         | 5'- TTCGAGGAGGAGGAGGAGAACTTCTA     | 87-95°C 5 min<br>42x (87-95°C 1 min, 60°C 1 min, 72°C 2 min), 72°C 10 min  |
| QT6 cMyc in rev   | cMyc 3DPCR         | 5'- GATTGCTCGTCCGGTCCGAGATGAA      |                                                                            |

**Supplementary Table 3 : Compendium of primers and PCR conditions used for nested PCR/3DPCR amplifications**

| <b>Target</b>                                                | <b>UPL Probe</b> | <b>Primers</b>                                                   |
|--------------------------------------------------------------|------------------|------------------------------------------------------------------|
| Mouse APOBEC1                                                | 27               | For : 5'-CCCATGAGCGTTGGATTC<br>Rev : 5'-TCAACCACGGGCAGTCTT       |
| Mouse ribosomal protein L13A (RPL13A)                        | 108              | For : 5'- CCCTCCACCCTATGACAAGA<br>Rev : 5'- GCCCCAGGTAAGCAAACCTT |
| Mouse hypoxanthine guanine phosphoribosyl transferase (HPRT) | 95               | For : 5'- TCCTCCTCAGACCGCTTTT<br>Rev : 5'- CCTGGTTCATCATCGCTAATC |
| Mouse TATA box binding protein (TBP)                         | 107              | For : 5'- GGCGGTTTGGCTAGGTTT<br>Rev : 5'- GGGTTATCTTCACACACCATGA |

**Supplementary Table 4 : Compendium of primers and UPL probes used for mouse transcriptome analysis.**
